# Supplementary material for: Founder mutations and genotype-phenotype correlations in Meckel-Gruber syndrome and associated ciliopathies
Source: PubMed Central journal article supplement (PMC3579735; doi:10.1186/2046-2530-1-18), 2012-10-01
Supplement: 2046-2530-1-18-S1.pdf [file 2046-2530-1-18-S1.pdf]

| <b>GENE</b>            | <b>MARKER</b> | <b>FORWARD PRIMER (WITH 'FAM' DYE)</b> | <b>REVERSE PRIMER</b>     |
|------------------------|---------------|----------------------------------------|---------------------------|
| <i>MKS1</i>            | D17S1606      | TGGTATTCAATCCTGGAGC                    | TGATGAGTCTTCATAGCCCC      |
|                        | D17S1290      | GCCAACAGAGCAAGACTGTC                   | GGAAACAGTTAAATGGCCAA      |
| <i>TMEM216/TMEM138</i> | D11S4191      | GCAAGATGGCCAATTAGAAG                   | TTTTGGTTGGAATGTAGTTGTTTAT |
|                        | D11S4076      | CATGAATGCTCTTGTCCC                     | AACCCCTGGAAAATAGACT       |
| <i>TMEM67</i>          | D8S1988       | CCTTTGGACTCAGACCAGAA                   | TAGTCAGAGTCCTCAGAGAAACA   |
|                        | D8S1699       | CAACCTGACCCTGCCA                       | CATGATGTTCTAAGCATATCTGC   |
| <i>CEP290</i>          | D12S1719      | TCCTCCAGTTTCAGTAATGTTT                 | GGTGGTTGATGCCTGTAA        |
|                        | D12S1710      | AGGTTTCTGGGTTCTGATA                    | CCATAATCCGTAGGAGCAA       |
| <i>RPGRIP1L</i>        | D16S3034      | TAATCTAGTTAAAGATGCAACTGCC              | GCTCAGAAGTTTTGATGCC       |
|                        | D16S771       | GTCCAAAACACCACCTCTA                    | AAGTAGATCAGTCATCTTGCTGC   |
| <i>CC2D2A</i>          | D4S1511       | AGCCTCTGTAATCTTGTGTG                   | TCCATTA CT CAGGGCTCTC     |
|                        | D12S2960      | AAGGCTTTATCATT AAGAATCCTA              | TGAGGGTATAGTTACCATCTTTT   |
| <i>TMEM237</i>         | D2S2309       | TGTCAGGCACTTCGCTA                      | TGCTTCTTATTGTACCCAAA      |
|                        | D2S1384       | AATAGAGGGCCCTTGCTTAA                   | TTTGGGATAAAAGGTATTTTGC    |
