# Supplementary material for: Founder mutations and genotype-phenotype correlations in Meckel-Gruber syndrome and associated ciliopathies
Source: PubMed Central journal article supplement (PMC3579735; doi:10.1186/2046-2530-1-18), 2012-10-01
Supplement: 2046-2530-1-18-S2.pdf [file 2046-2530-1-18-S2.pdf]

| Exon           | Forward                     | Reverse                   |
|----------------|-----------------------------|---------------------------|
| <b>MKS1</b>    |                             |                           |
| 1              | CCGTTGCCAGGAAAACAG          | AAGCAGAAAGTGGGGACCTC      |
| 2              | CTTGGAACCCTACCTCCTC         | TGCCGGGCAACTCTATAAC       |
| 3              | CCACAGAACAAGAAGTGGTGC       | CCAGCCATGTGGAGGTAGAC      |
| 4              | AAAACATGTCAGATAGCATCAGTTC   | AGACAGGCTACTTGTCTCCCC     |
| 5              | TCTTCTTTGGGTTGTTTGGC        | TCCCTTCCCTCTCTCTGAGG      |
| 6              | GAAGTGGCTCTCCACTGGG         | GCTGGTGAGAGGAGAAAAGG      |
| 7              | CCTGCAGTGGGCTCAGTATC        | AAGTGCAACCAAGGGAAGG       |
| 8              | CTGGGCTGGGAGCTATCC          | CAGCTCCAGGCACTGAGG        |
| 9              | TGAACCTTGGTCTAGCTTGGG       | CCACAGTCAGAATGCTCCG       |
| 10             | GATTTGTAGATGGGGCTGGA        | AGCAGACAAGGCCTCTACCA      |
| 11             | TTGGGTGCTAAGGGTGGTAG        | AGCCTGACCAAATGCCTCTA      |
| 12             | CTCTCCGAGAAACACCCAAG        | CCACACACAAGTCACCCAAC      |
| 13             | TTGGGTGTCCTTTTGCATCT        | TCTGGGAGCAAGGAGAGAAG      |
| 14             | AGTGCTGTCTTGGTGAAGG         | CCAGAAGCATTGAGTGTTAG      |
| 15             | GTCATTGCTGGGGAGTCAG         | CACCTCCTACAGAAGGACAGG     |
| 16-17          | GGGGGTGTCTAGAGAGAGCA        | GCACTGCAGAGAGAAACAGG      |
| 18             | CATGGGCCTGTTTCTCTCTG        | CCACAGGGTCTCTGGCTTTA      |
| <b>TMEM216</b> |                             |                           |
| 1              | CGTCGCTCACACCTTTTCTT        | GGGTTTAGGTCAAGCTCTGG      |
| 2              | CAGCGTCTAGTTTCCCCAAA        | GGGCAGAAAAGAACGGAAAA      |
| 3              | GCTGAGACTGATGTCCTCTTTT      | CAGATCCAGTCTATGATAGTCAACC |
| 4              | TTGCCATTCCATCACATCTC        | CCCCTTAGGCTTCAGAAGAA      |
| 5a             | TATCCTTTGGGGCCAGGAG         | ACAGCTCGTACAGGGAGCAT      |
| 5b             | CCCCTGCTGACCTCAAGTT         | GCTCCTGAGAACAAACTGCTG     |
| <b>TMEM138</b> |                             |                           |
| 1              | TGCAACTGGAGTGGTACCTG        | GTCCTGGGATTATGGGTGTG      |
| 2              | ACTTTGCCCTCAGCATCTCC        | TGCCTGTAATTCCAGCACTTT     |
| <b>TMEM67</b>  |                             |                           |
| 1              | GGAGGCTGTGAGGCTTCC          | GGTGAAACTCCATTTACGGG      |
| 2              | TTATTAAGTTTCACTATCTGGGAAC   | AATTTTAAAGTCTGTGGGGAAAC   |
| 3              | CATACTCTTATGGCATTGAACTTAC   | AGAATTGCTTGAGCCACTGC      |
| 4              | TTTATTATGGAGATACTTGTATGCC   | TGGGCCTCAGCTTCTGTATC      |
| 5              | CTAATCCATTGTTTAGAAAGACAGC   | CCTGAAATTAATAATGGATGAAATG |
| 6              | TTCAGTTGCTTATGCCTTTTCA      | CAAAAGGGTTTCTATTCTAGCC    |
| 7              | TGTGAGACATTTCCATTCAAC       | GCCACAAGAAAGAGTTTATTC     |
| 8              | TGGAACAGACCTGCACAAAG        | GCCAAGGAAGATTCTGTCTCC     |
| 9              | CTGCTGGACTGAGCACTGTT        | CAATCCAGAAGTATCCACATATTCA |
| 10             | AAAACCACTAATTCTTTCAAGGTC    | CTCTTGGCTTTGTCTCAGGC      |
| 11             | TATCCATGTTGCGGTTTGGAG       | GCAACAAGAGCAAACTCCATC     |
| 12             | TGCTTGCTAATTTCAATTGTG       | CAACAGTTTCTAAGTCCACCAGC   |
| 13             | GAACGCCATTGTCAGGTG          | CCGACCAACTGTTCCAATTC      |
| 14             | TGTGTAACCTTCTTAGTCCTTG      | TCAGGATCCATAAGAACTCACC    |
| 15             | TGGTAAAACCCAGCTACAAATG      | TCTGGGGAAAGAATAGCTGG      |
| 16             | GAGCACTTCTTACTTGTTCACAG     | TGAGAAGGATCCAGAATGGTC     |
| 17-18          | GGCTTCAGGCTTAAGAAATGG       | TGCTTTCTTTCAAACCAAAGTG    |
| 19-20          | TCCTTAGTGGTATTATAACTTCATGTG | TGGCTTCACAACAATATTTCAAC   |
| 21             | GGTGAGTAGGGAGAGGTTTTCTG     | TGCTACAGAAAGAAGGATGTGG    |
| 22             | GAACTGTAAAGGCCACTG          | ACAACCAGTGGAAAATTGGC      |

|       |                           |                          |
|-------|---------------------------|--------------------------|
| 23    | TTGCCAGACTTGTTTCTCC       | CACTTGAACCCAGAAGGCAG     |
| 24-25 | TGAATTTACTTAGCACCTGAATC   | AGGGAAGGTCTTAAGGTGGG     |
| 26    | TCCTGCTGATTTTACATTAATTGC  | TTGGGAAGCTGAGGCAAG       |
| 27    | TTGTCACCAGAAGTTTATCACAGAC | TATTCCTTCTTTTGGTGGGG     |
| 28    | TGTATCACTATGGGATTCAGATACC | TGCATTAATACTACACACAATGGG |

**CEP290**

|       |                          |                           |
|-------|--------------------------|---------------------------|
| 2     | ACCAATAATACTGTGTACCTTG   | CAGATTGTGACAATTATAGTTG    |
| 3     | CAACTATAATTGTCACAATCTG   | GTTCCACTAATAGCCAAACC      |
| 4     | GTGCTTACATTCCAGTATAAAG   | GTTTAATGAACAAATGGAATTCA   |
| 5     | ACCTTATAATCATGATGGACTC   | AATAACCATGATTACAATCATCC   |
| 6     | TTGTTGACTCATTTGAACCTC    | AAAAAGCCAGGTAACCTGAAC     |
| 7     | ACTGCTGAATTTTATCTTCTTC   | TTAGAAGACTCCAGTCCTGG      |
| 8-9   | CAAGATAATATGCATCATTTTCCC | ATGAAATTAAGTTTTTAGGAACC   |
| 10    | AGAGGACACTTATGGCTGCG     | GTAATGAGATAATATGAAGTCTG   |
| 11    | CACATATGTAATGTAATGTATCC  | CTAATAAACGTGTTATAAACAG    |
| 12    | GTATCATAAATCTACTAACGGTG  | ATCGTTCAGAGTTCCAAGT       |
| 13    | CTTGTAACCAAGAAAATATG     | AGAAAACCAATATTGACTTGAC    |
| 14    | TGATTTGAAGGAATAAGTAGTC   | CTGTGAATGGCAAGAATAATTC    |
| 15    | GTACATTTTCTTTAGACTTAG    | ACTTGAAATCAGGTTGCGC       |
| 16-17 | CATTTTGCAGCTTATTTGAATG   | ATATCCAGACAACCTCACTTATC   |
| 18    | ATTAAGTGTTGGAATAGTAGG    | TATTTTCTTTACTCTCTTTGC     |
| 19    | ATTGATCAAACCTTTCTTAACTTG | ACAGAGGTAATTAGGAGTAAAG    |
| 20    | CCAATGATGTCTTTGGTATATG   | AAATATCTCATCAGAACTATGG    |
| 21    | GTCCATTTTATTTAAAGACAGAC  | TTAATTCAAGGGGCATTTTCTC    |
| 22    | TATGGTTGAGGTAAAATTCCTG   | AGTACTATCTGCATGCTTTGG     |
| 23    | TAACCTTCTATAATGTTGTCAG   | TAAGTTCCTAACAGTAGTTACC    |
| 24    | ATACCTCTTGTTGAGAAAAC     | CACAAAGACACATCCATATTAC    |
| 25    | TATGCAATATTGTACAAAGTAGG  | TGATACCATCCTATCTTCTGC     |
| 26    | AAAGTGGCTAGTGCTTGACC     | TGTTAAATTTATATAAATGCAGGC  |
| 27    | AACTGGATTGTGAGTTTTAAGG   | AGGATTATTCATCTGCCTAAG     |
| 28    | ACAGCATCTAAAATATCTGAGG   | AGATCCAGACAAACCACTTAAC    |
| 29    | AAGCCAAGTAAAGAGGATTG     | TACTACTAAGAATTGTATACCTG   |
| 30    | TAGAAAGTGTACTTAATTGTTCC  | CCCCTCCCAACATCTAATG       |
| 31    | CATTTGGATTTAAGTTTGTTGA   | AGCCCAGGAGTTCCAGCTAT      |
| 32    | CATTATCATCAATGGAGGAATG   | TAGTCATTTGTGCAATATTCTTG   |
| 33    | CCTGTTATGTGCCTGATGTC     | TGAGTTAACACTCTAGACTATG    |
| 34    | ATCTATGTTTTATCATAAGCTG   | ATCATTCTATGCATTGCCCTC     |
| 35    | GCATTTTAAAGGGAAAAAGATAC  | CACTTTAGGGTAAAATAATATTTAG |
| 36    | ATATGGAGATACTGTTTCTTCC   | GCTGAATTTAATTTACATGGTC    |
| 37    | AATATGGAATAAGTATGGCATTG  | AGCAAACACTTATGTTTATCTTC   |
| 38    | GTGACAGAGTGAGACTGGG      | ACAACACGGAGATTTATACTAC    |
| 39    | ATAGTAGGAAGTAATAAAGCTTG  | TAGTGAATTCTCTTCCAATAGG    |
| 40    | GTTCTTTTATCATTGATACTTC   | AAGTAGAAATAAACTACTACCTC   |
| 41    | GTGATAGCTTCAGAAAGTTGC    | CAGAATTAATACAGCCAGGTC     |
| 42    | AACATATTTACATATTCTCTAGG  | TAAAGCTATATAATTTCCAGGTC   |
| 43    | TTTGGTTTGGTAATGAGTATGC   | TTCAATTTCTAGGGGTCAACC     |
| 44    | CATGGAGGGTCTGTAGGTCA     | GGCCAGATTAAGAAAGAAGTTGAT  |
| 45    | TATCCAGTATGTCTTTTATGGC   | ACCATCACCATGATATATTAGG    |
| 46    | TTTGCCTTTCTTTCAATGGC     | TATCTAACTTTTCAATTTCTGGC   |
| 47    | TGTTGTATTGTTGGTACTTCG    | TTAGCCTTGCCTCTCATAAG      |

|    |                         |                        |
|----|-------------------------|------------------------|
| 48 | TGGTTTCTAAACTACTTTGAAG  | ACTTCCAGTTTTTCCAAGAGG  |
| 49 | TAGAGCCCCAGGTTATTTTTG   | TGTTTCATCAGGAAGAAACCAG |
| 50 | TTAGTACAGTTATTTGAACTGAC | ACAATGCAAGGAACATCTTGC  |
| 51 | ACGCTTTGTTAAAAATGTGTATC | ATGCTTGTCTCTAGTTGTAGC  |
| 52 | TCACTAGTTCATAAGAAATGCC  | AATTCGATTTTACAGGGAGAC  |
| 53 | CCATTACCTTGAACTCATTTCG  | TAGGATACGTAGTTAAAGATGG |
| 54 | ATTCAGGAATACTTTGGCTTTC  | TTCGGAGAACTGCTTATTTCC  |

**RPGRIP1L**

|       |                              |                             |
|-------|------------------------------|-----------------------------|
| 1     | TTTGGTTCATTCCATTGCATAG       | ACTTAAATGGTTTGGTTTGTATGAG   |
| 2     | AATGGATACTATTGTTATTCAAATTCC  | CATCCTGCCTTGTCCAAAC         |
| 3     | TCTTCACAGTGATTATGTTCCTTTC    | TTTCTCTTCTAAAGACACTTAAAAGC  |
| 4     | TGGCTGAGATCACATATTCCC        | GCTGTATTTCAAGTGGAGCAAAC     |
| 5     | ATTTCACTGTGTGCAGAGGC         | GCAGTTAGTAGGTCGAGCATAGG     |
| 6     | CCATAGATTTTCTTCTAACTTGCG     | AACAACCTGAATACTACTTTTGAATCC |
| 7     | GGTGAACCTCGGGAGTAAATTC       | TTTGCTGTGCTCAAAACACC        |
| 8     | GCAGCTACCATTTAGCAATCG        | TCTGACAACAGCAAATGCTTAC      |
| 9     | GGTCTCTGCGCCACTAAAAG         | TGACTGATTCAATGAAGAAACATTAG  |
| 10-11 | TTTGAAATGTGCTCTTAAACCTG      | AAGGGTTACAGATAAGGGTCATC     |
| 12    | TCCATCAGGAATGAAGCAGTC        | GGGTGACAACAGCAAAACTC        |
| 13    | TGCTTGAATCATAGTTGCTTTG       | CACTGTAAGTGCAGATTTGGATG     |
| 14    | TTCAAAAGCCAGTTTTCATTTTC      | GTCCTTGCTCTAAAGGCACC        |
| 15    | CCAATCTCACATCATTTGTGC        | AAAAGACACTTGATGGCTGTG       |
| 16    | TATCTTATTTGGGGCTTGGC         | AAAGACTGAGAAGAGGTTAGGGTG    |
| 17-18 | TTCACATGGTAGAGCATGAGTC       | TGTTTCCATTTAAATCAGGTAGGG    |
| 19    | TTGAACATTTGCATTGCTCTC        | GGGAAATGCTATGACTTCTCTG      |
| 20    | TTTACATGCTTTATTATTCAACTGTTCC | AACAGGTATCGTGAAGTAGACGC     |
| 21    | TTTTCCCTAAAATGTAATGTGTCTG    | TGTACTGTGAATGAAAGGCAGC      |
| 22    | TGACATGCTGAGATGAAGTTGTC      | CGGATCATGAGGTCGGG           |
| 23    | TTCAAGAAAAGAAGCCCATTG        | TTCTTAATCTTTATGCTACTGGTTTG  |
| 24    | GTGAGGTGGCATGACTTGTG         | TGCCTTTTATTTAACCATGTCC      |
| 25    | GTTTTGTCTCGTGGTGATTC         | AGCACCTTGGAGCCAG            |
| 26    | CCCAAGATGCCAGTGAACCT         | GAGGGGTGGCAGTTATGAGA        |

**CC2D2A**

|    |                             |                         |
|----|-----------------------------|-------------------------|
| 1  | GGTTCCTGGTGAGTGGAAG         | GTGCAATAGATGCTGGTTGG    |
| 2  | GATGATGAGAGCCGCACAG         | GTATGGACCCCCGCTTATT     |
| 3  | ATAAGGCGGGGTCCATACT         | CTCAAATGGCGTCTCTCTC     |
| 4  | TCAGGTGACAGAGACTGTGGTT      | TGGGGTAAAGTGGGTGGAG     |
| 5  | TCCAATCTGAAATGTGACCTTC      | TGTTAGTCCATTTTGCATTGCT  |
| 6  | TAAATTACCCAGTCTCAGATATTCC   | CCTTCAGAGCCATGAGAAAA    |
| 7  | GGCAGGACTGAGTTTTTGTG        | TGTGCCAATGCAAATAAGA     |
| 8  | TTTCTTGCTCTTCCCCTTA         | CTTGGACTCAAGCGATCCTC    |
| 9  | GAAGATAAGCCTTTGGGATGG       | ACACCCGGCCTGTAGTCA      |
| 10 | CAACTGCCTGTGGCAGATATT       | CGTGGAGTGTCTATTCTCTG    |
| 11 | CATGAGTTTGGTATTGTGAATTATTTT | GGAATCAGTTCTGGAGATGAGG  |
| 12 | TCATCTTTTCTTGGTTCTGC        | TGGGTTTTGAGCAGTTGAGA    |
| 13 | GGGGGAGGAAGTACATGAAA        | GCCTGATGTTTGTCTTTATGTGT |
| 14 | TGGCCTCTAAAACCTGGAAA        | CACACATCCTAAACCGAGGA    |
| 15 | CACCATTTTGGCCAGGAG          | TGACCATTTCTTACATCCTCA   |
| 16 | TCTGCCTAAAGAGAACAAAATCAA    | CCTGGGAAGTGGTTACATGC    |
| 17 | AGCATCTGCCTCACAGGATT        | AGCCAGTCAATTCATTATCC    |

|    |                          |                          |
|----|--------------------------|--------------------------|
| 18 | AGGCACAGAGAGGTCAGGTG     | CCCATGTCGTGCATGTGT       |
| 19 | TGTGCCCTTTTCAGTGTCTG     | GTCTCGAACTCCTGGCCTTA     |
| 20 | TTAGGGCTGGAACAGTGACC     | TGGTTGTCTGGGAAGTGAAA     |
| 21 | CACCCACTCCAAGTTCCATT     | TGGCACCTGACAATAAAAGG     |
| 22 | GCTTCCTCAAGTCATGCTGTC    | ATAGCCAGGCAAGAAGCACA     |
| 23 | AGGGAAGCATGAACACCAAA     | CCGCTATTGCTAGTGACAACA    |
| 24 | AGCCACCTGTCTCAGAATCC     | TGGCTTGCATAAGCTCACAT     |
| 25 | GGGGGACACTGAGATGACA      | CATTATTCCTGGCCCAAATG     |
| 26 | GAGTTTTTCAGGGGCGTGT      | AACCACGTTAAGAATGAGAGTGA  |
| 27 | GGCGACAGAGTGAGACCCTA     | CTTCACCTTAGCCGTTTCTCA    |
| 28 | TTGGGTATTTTCAAATGCTG     | GATCGGGACCCCTTTCTG       |
| 29 | AATCTTGCTGCTTTCCTGCT     | AGGCTCATCTCCAACCTCTG     |
| 30 | CCTTCTGGCGAGTGCTTAG      | TTGCTGATTGACCCGATTACT    |
| 31 | TCCCAAACCATACATTTCTG     | AGTCATCTGCCCGCCTTG       |
| 32 | AGGATGTTTGGTGAGGATGG     | TTTTTATGGCTAATGAATGTTGC  |
| 33 | GAGAAAACACCATGCCCACT     | CCTGAGGACCACTGAAAACC     |
| 34 | TGCAAAACTAAGCATTGCACTT   | GCTTTGTCATTCTGCTTCTCG    |
| 35 | TGCGGCCTATATGAACACTT     | CTGTTTCTTGTTGTGAGTTGAGC  |
| 36 | CTTTTGGTGGGTCATGGGTA     | AAGTTGCCTAAATTGTTTACATTC |
| 37 | CAATCATCTGAATCCCCACT     | TGAAAAATGGTGGTATTTTGCT   |
| 38 | GCTGAGTAGAAAAACACAAGCAAA | TTGCCCAAGCAAAGGTAAG      |

***TMEM237***

|    |                         |                          |
|----|-------------------------|--------------------------|
| 1  | ACACCCAGGCCTGCACAGACTCG | AGATGAGTGAGGCGTCGTCGTG   |
| 2  | TGCACGCCTCTCACCGCAACAT  | TTCCACCCACCCAGAGACCCAACC |
| 3  | GATGGTATTTGAAGTAAAGAT   | GAGTTTCCTGAATCATTGTA     |
| 4  | TGCACGCCTCTCACCGCAACAT  | GGTGCAGTCCTCATTATAG      |
| 5  | TCTTCCCCTAATCTATAAACG   | ACTGGCCTTAATTCTATCCTC    |
| 6  | TGAAAGAGATGGGGTTATTC    | GCTTAAGCCATTGGAGTTAT     |
| 7  | AAAACATTTTTGCCCAATTA    | CAAACAAAGCATCAGGGTAA     |
| 8  | GCCCTCAGAAATGTAAGTA     | TCAGATTTCCAGAAGTATAAAG   |
| 9  | TCGCTAGTTGTTAGTAATTACG  | TACCTACCATTTTAAGTTGT     |
| 10 | TAAACATCCTATTGGAATTG    | AAAGAACAGAAGTAGACTGGC    |
| 11 | CATGCGTGTTAAGTATACACT   | AGGTAATGTTTATAAGGAGC     |
| 12 | GGATGTCTGGCCTATTGAAA    | GCAGGTGGACATAACAATAG     |
| 13 | TTTCTTAGGAGAGGACTGCT    | TTGGCATTCTGTTACACC       |
| 14 | CTTGAGGGCTTTCTATTAGT    | CTTCTACCATATTGCTAAAT     |
