# Supplementary material for: Founder mutations and genotype-phenotype correlations in Meckel-Gruber syndrome and associated ciliopathies
Source: PubMed Central journal article supplement (PMC3579735; doi:10.1186/2046-2530-1-18), 2012-10-01
Supplement: 2046-2530-1-18-S3.pdf [file 2046-2530-1-18-S3.pdf]

TMEM67

D8S1988 289 287 289 285  
 D8S1699 215 217 215 221

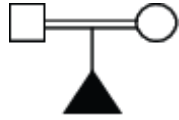

D8S1988 289 289  
 D8S1699 215 215

29A

289 285 289 285  
 215 207 215 221

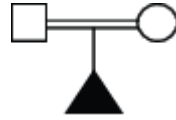

289 289  
 215 215

33A

289 285 289 285  
 215 225 215 217

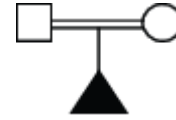

289 289  
 215 215

70

285 285 289 285  
 215 225 215 215

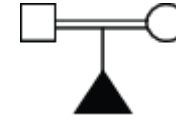

285 289  
 215 215

76

CC2D2A

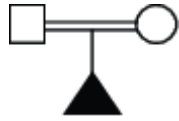

D4S1511 150 150  
 D4S2960 245 245

158

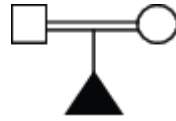

150 150  
 245 245

180

RPGRIP1L

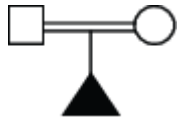

D16S3034 275 275  
 D16S771 257 257

207

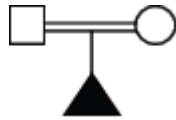

275 275  
 257 257

336
